# Supplementary figures and images for: Successfully Navigating Multiple Electronic Health Records When Using Telepsychiatry: The NC-STeP Experience
Source: Atypon-hosted journal article supplement (doi:10.1176/appi.ps.201700406), 2018-05-15

Figure 1: Workflow for the Portal

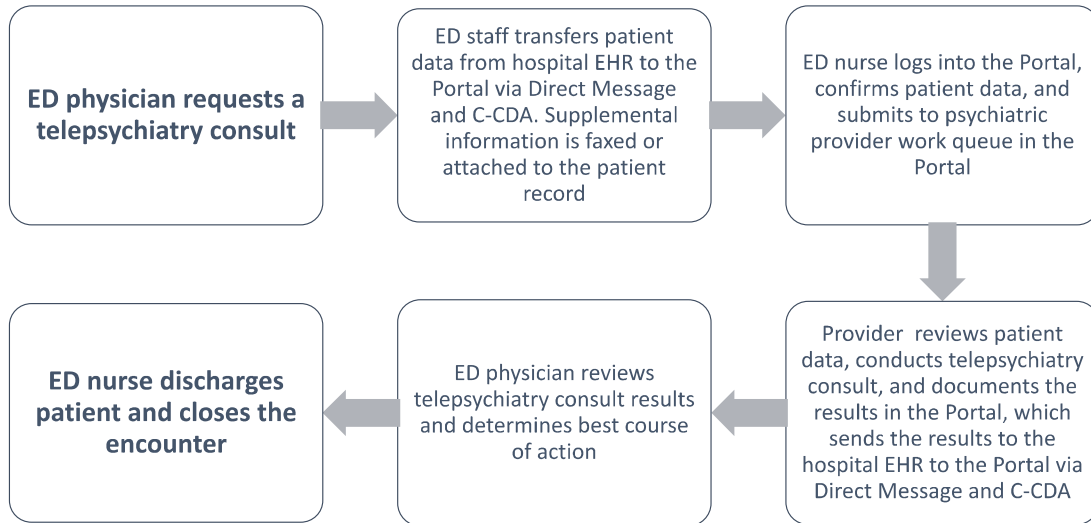

Supplement: appi.ps.201700406.ds001.pdf [file appi.ps.201700406.ds001.pdf]
